# Supplementary material for: Highly porous N-doped carbons impregnated with sodium for efficient CO2 capture
Source: Royal Society of Chemistry journal article supplement (doi:10.1039/c5ta01776a), 2015-01-01
Supplement: c5ta01776a1.pdf [file c5ta01776a1.pdf]

## Electronic Supplementary information (ESI)

# Highly porous N-doped carbons impregnated with sodium for efficient CO<sub>2</sub> capture

Yun Kon Kim,<sup>a</sup> Gi Mihn Kim,<sup>a</sup> and Jae W. Lee<sup>\*a</sup>

Department of Chemical and Biomolecular Engineering, Korea Advanced Institute of Science and  
Technology (KAIST), 291 Daehak-ro, Yuseong-gu, Daejeon 305-701, Republic of Korea

### TABLE OF CONTENTS

|                                                |           |
|------------------------------------------------|-----------|
| <b>A. Supplementary Results and Discussion</b> | <b>2</b>  |
| <b>B. Supplementary Figures</b>                | <b>5</b>  |
| <b>C. Supplementary Tables</b>                 | <b>16</b> |
| <b>D. Supplementary References</b>             | <b>20</b> |

## A. Supplementary Results and Discussion

### Thermogravimetric analysis

TGA analyses were carried out to confirm the thermal stability of  $\text{Na}_2\text{CO}_3$ , NS2, and SNS2-20 possessing  $\text{Na}_2\text{CO}_3$  (Fig. S1). The weight decrease during the initial heating up stage up to 100 °C is attributed to the evaporation of surface water.<sup>1</sup> The weight of  $\text{Na}_2\text{CO}_3$  keeps almost constant up to 900 °C, and then, it gradually decreased with the increase of temperature because of the melting of  $\text{Na}_2\text{CO}_3$ .<sup>2</sup> For NS2, it lose its weight as much as 6 % up to heating temperature of 100 °C, and the additional weight percent of 4 % was reduced until 630 °C, which is related to the evaporation of interlayer water and the desorption of the adsorbed gas molecules. The steep decrease of the weight from around 700 °C is associated with the decomposition of the carbon support activated at 700 °C. In the case of SNS2-20, it indicated large reduction (*ca.* 20 %) of the weight until 100 °C, as it contained much water during the previous impregnation process. Then, the weight percent gradually decreased with the rise of heating temperature due to the decomposition of interlayer anions and, desorption of the adsorbed interlayer water and gas molecules.<sup>3</sup> In the range of 700 to 1000 °C, the weight loss is due to the decomposition of carbon structure and strongly connected carbonate, considering the change of weight for  $\text{Na}_2\text{CO}_3$  and NS2.<sup>3</sup>

## Isosteric heats of adsorption<sup>4,5</sup>

Isosteric heats of adsorption ( $Q_{st}$ ) were estimated from the CO<sub>2</sub> adsorption isotherms data at 0, 25, 50 °C by means of the Clausius-Clapeyron equation.

The Clausius-Clapeyron equation for  $Q_{st}$  can be defined as,

$$Q_{st} = RT^2 \left( \frac{\partial \ln p}{\partial T} \right)_q \text{ at constant adsorbate loading, } q.$$

Where, R indicates the universal gas constant (kJ mol<sup>-1</sup> K<sup>-1</sup>); T temperature, P pressure.

## The Ideal Adsorption Solution Theory (IAST) selectivity<sup>6</sup>

The IAST selectivity was calculated by fitting the pure component adsorption isotherms with a Single-site Langmuir equation for N<sub>2</sub> adsorption isotherms, and a Dual-site Langmuir-Freundlich equation for CO<sub>2</sub> adsorption isotherms, where the adjusted r<sup>2</sup> values for each fitted isotherm exceeded 0.999.

The equations can be defined as,

Single site Langmuir model<sup>7, 8</sup>

$$q = \frac{q_{sat}bp}{1 + bp}$$

Dual-site Langmuir-Freundlich model<sup>9</sup>

$$q = \frac{q_{sat,A}b_A P^{n_A}}{1 + b_A P^{n_A}} + \frac{q_{sat,B}b_B P^{n_B}}{1 + b_B P^{n_B}}$$

Where, q indicates the amount of CO<sub>2</sub> adsorbed (mmol g<sup>-1</sup>); p is the pressure (bar); q<sub>sat</sub> is the saturation loading (mmol g<sup>-1</sup>); b is the Langmuir (bar) or Langmuir-Freundlich parameter (bar<sup>-n</sup>), and n is the dimensionless Langmuir-Freundlich exponent.

The IAST selectivity ( $S_{CO_2/N_2}$ ) equation can be expressed using following equation

$$S_{CO_2/N_2} = \frac{\frac{q_1}{p_1}}{\frac{q_2}{p_2}}$$

Here, q<sub>1</sub> and q<sub>2</sub> denote the adsorption uptake of component 1 and 2, and p<sub>1</sub> and p<sub>2</sub> indicate the partial pressure of the 1 and 2. For the CO<sub>2</sub> : N<sub>2</sub> = 0.15 : 0.85 volume ratio, p<sub>1</sub> and p<sub>2</sub> represent 0.15 bar and 0.85 bar, respectively.

## B. Supplementary Figures

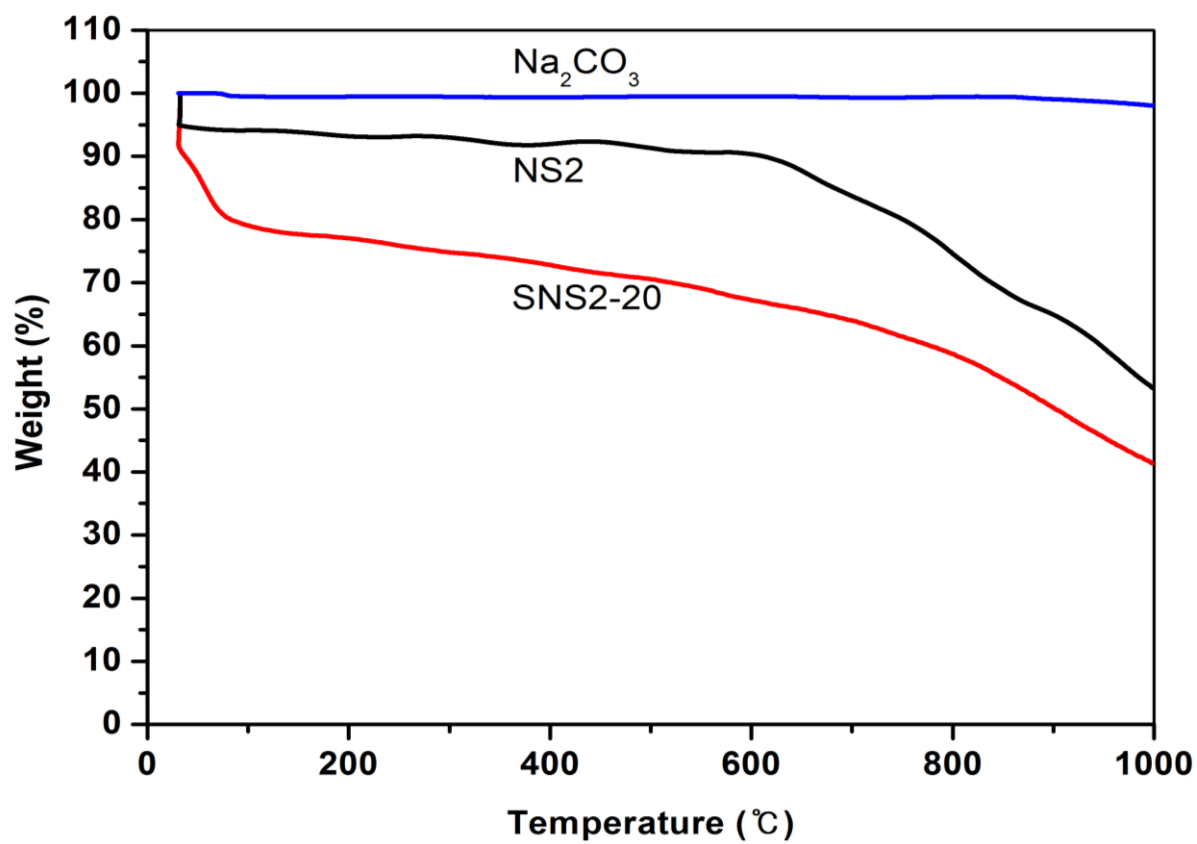

**Fig. S1** TGA analyses of Na<sub>2</sub>CO<sub>3</sub>, NS2, and SNS2-20 under nitrogen atmosphere with heating rate of 10 °C min<sup>-1</sup> up to 1000 °C.

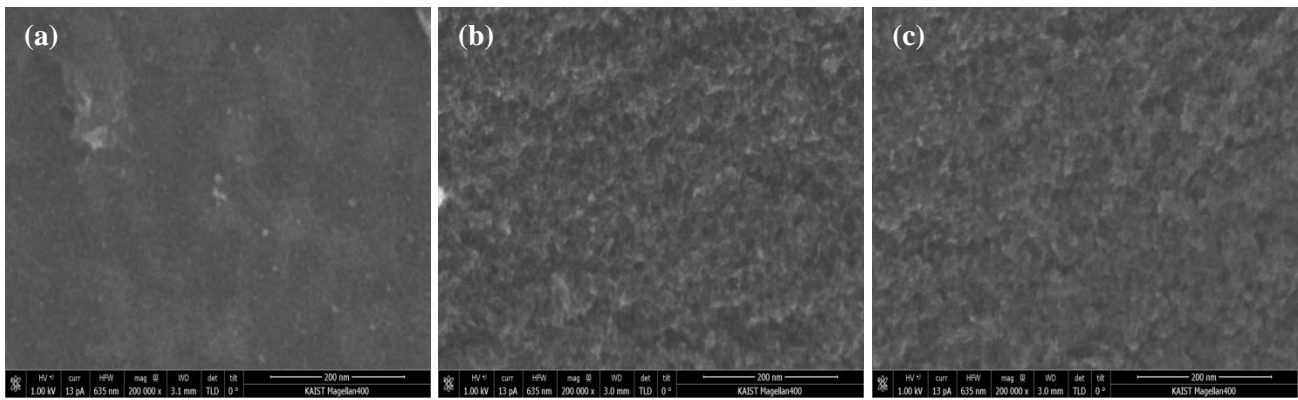

**Fig. S2** SEM images of (a) NS1, (b) NS2, and (c) NS3.

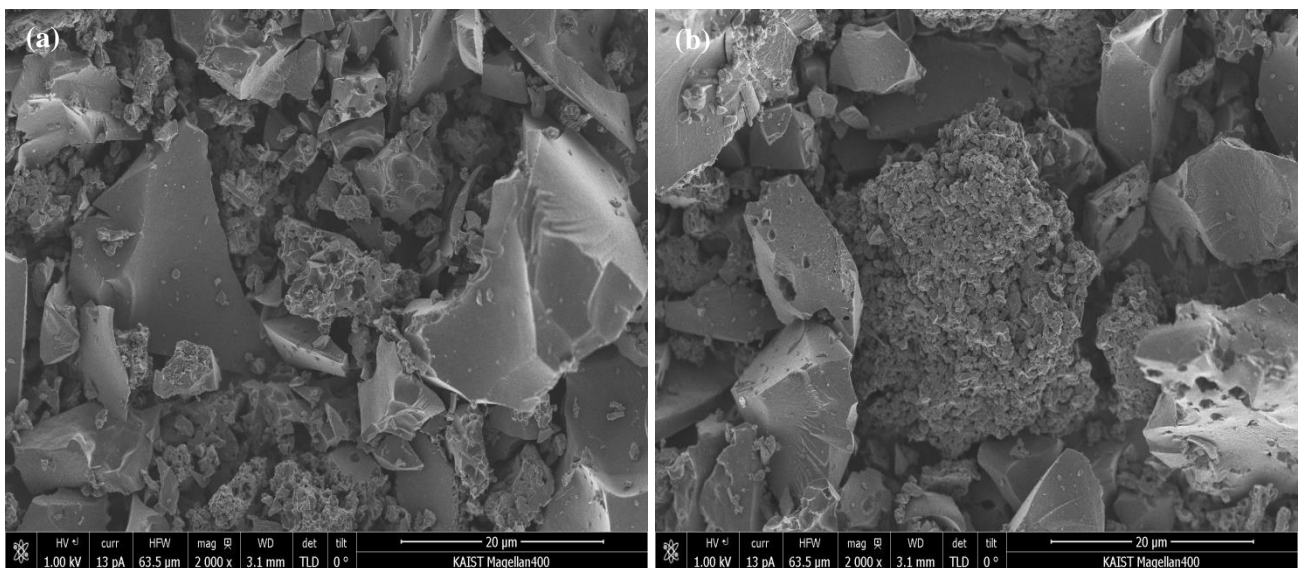

**Fig. S3** SEM images of NaOH impregnated sample (a) SNS2-10 and (b) SNS2-20.

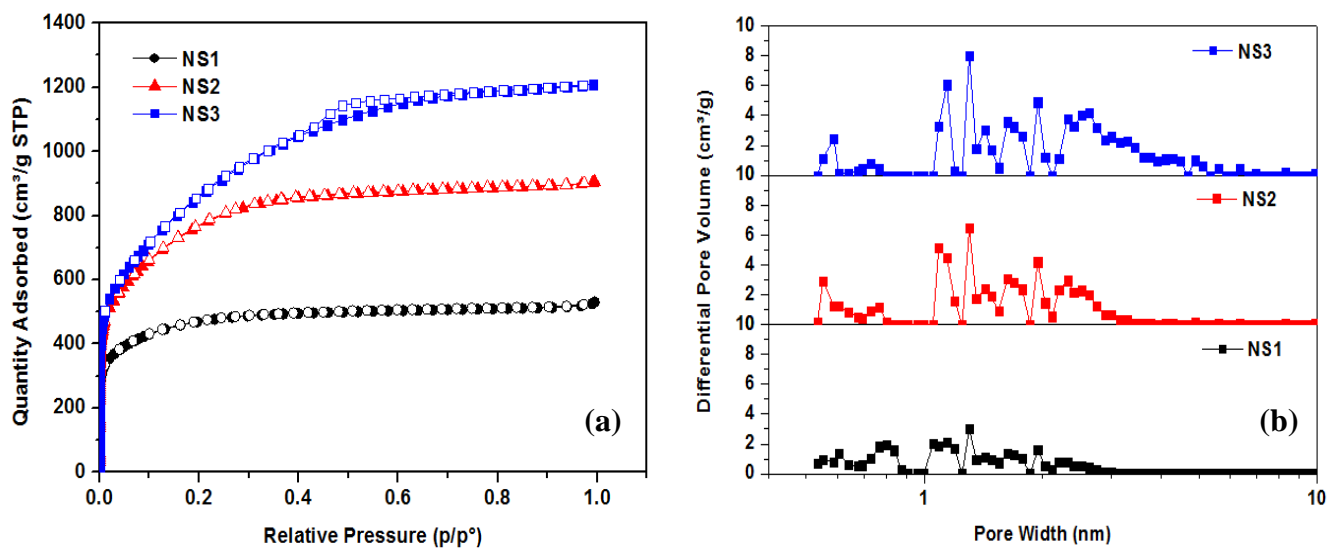

**Fig. S4** (a) N<sub>2</sub> sorption isotherms at 77 K and (b) pore size distributions of NSs prepared with different KOH/PAN ratios.

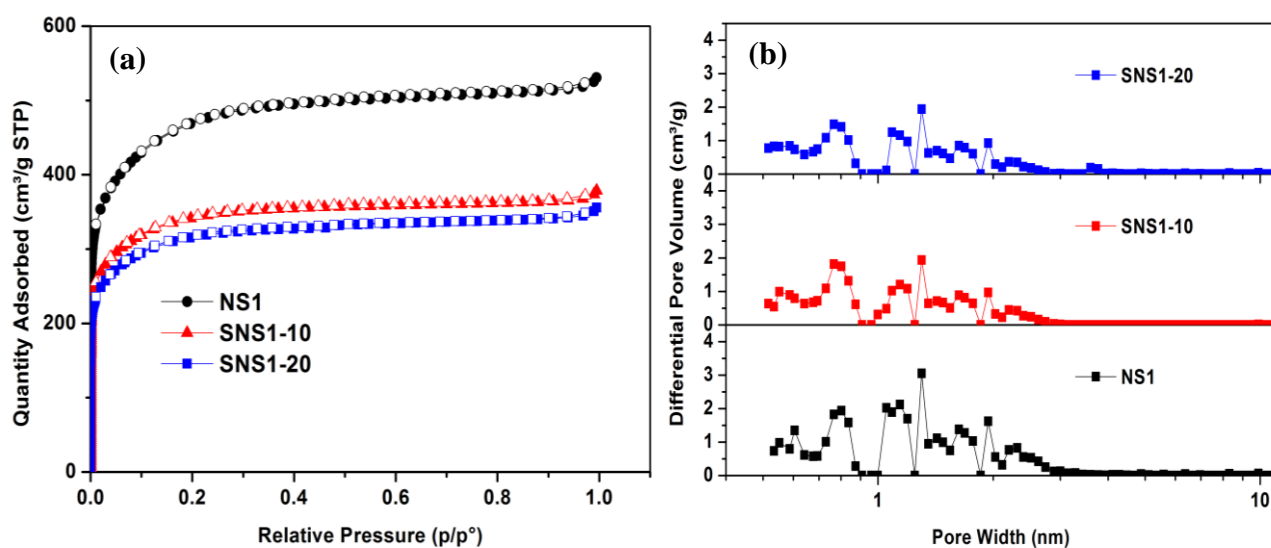

**Fig. S5** (a) N<sub>2</sub> sorption isotherms at 77 K and (b) pore size distributions for NS1 and NaOH impregnated SNS1-10 and SNS1-20.

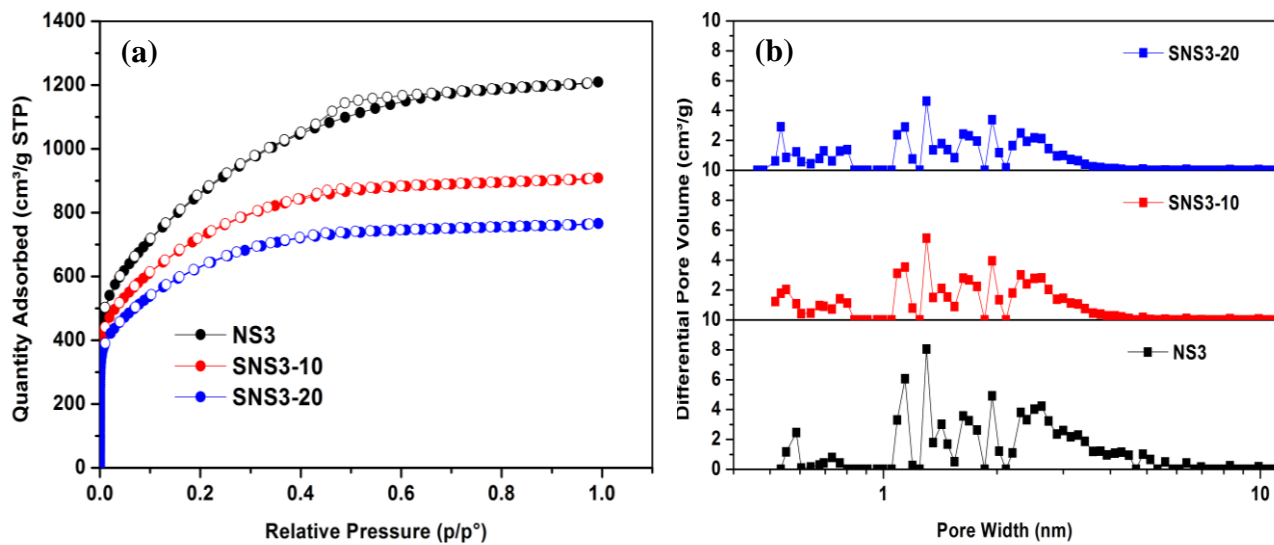

**Fig. S6** (a) N<sub>2</sub> sorption isotherms at 77 K and (b) pore size distributions for NS3 and NaOH impregnated SNS3-10 and SNS3-20.



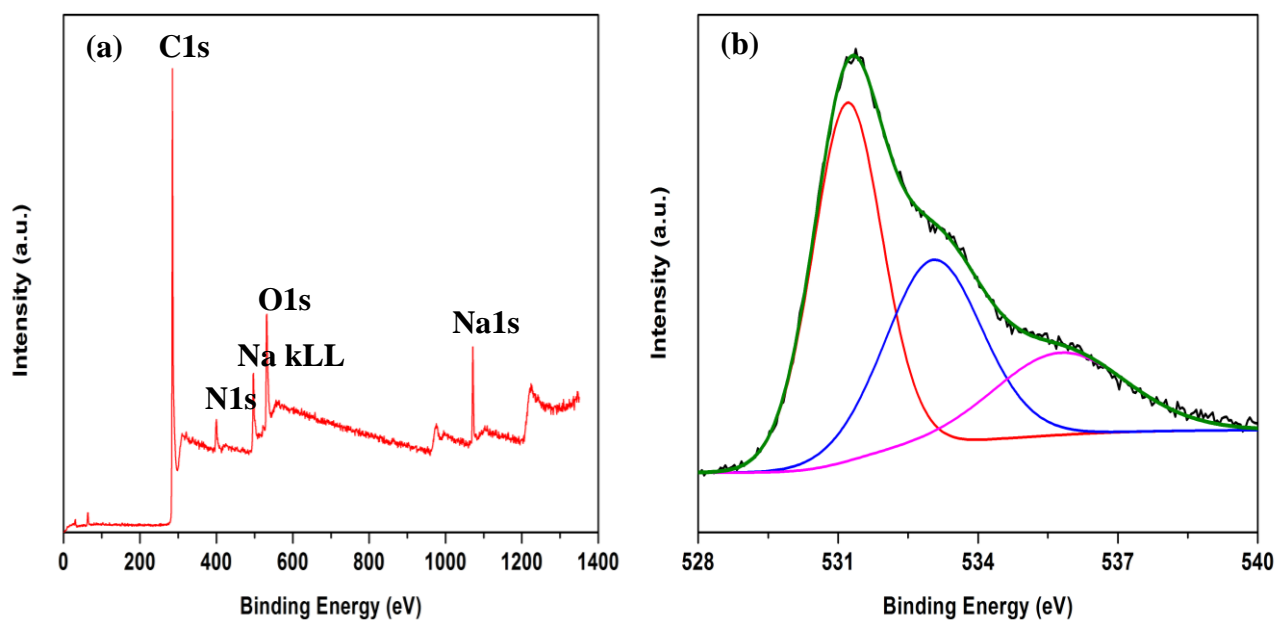

**Fig. S7** XPS spectrum. (a) full survey spectra and (b) O 1s core level for SNS2-20.

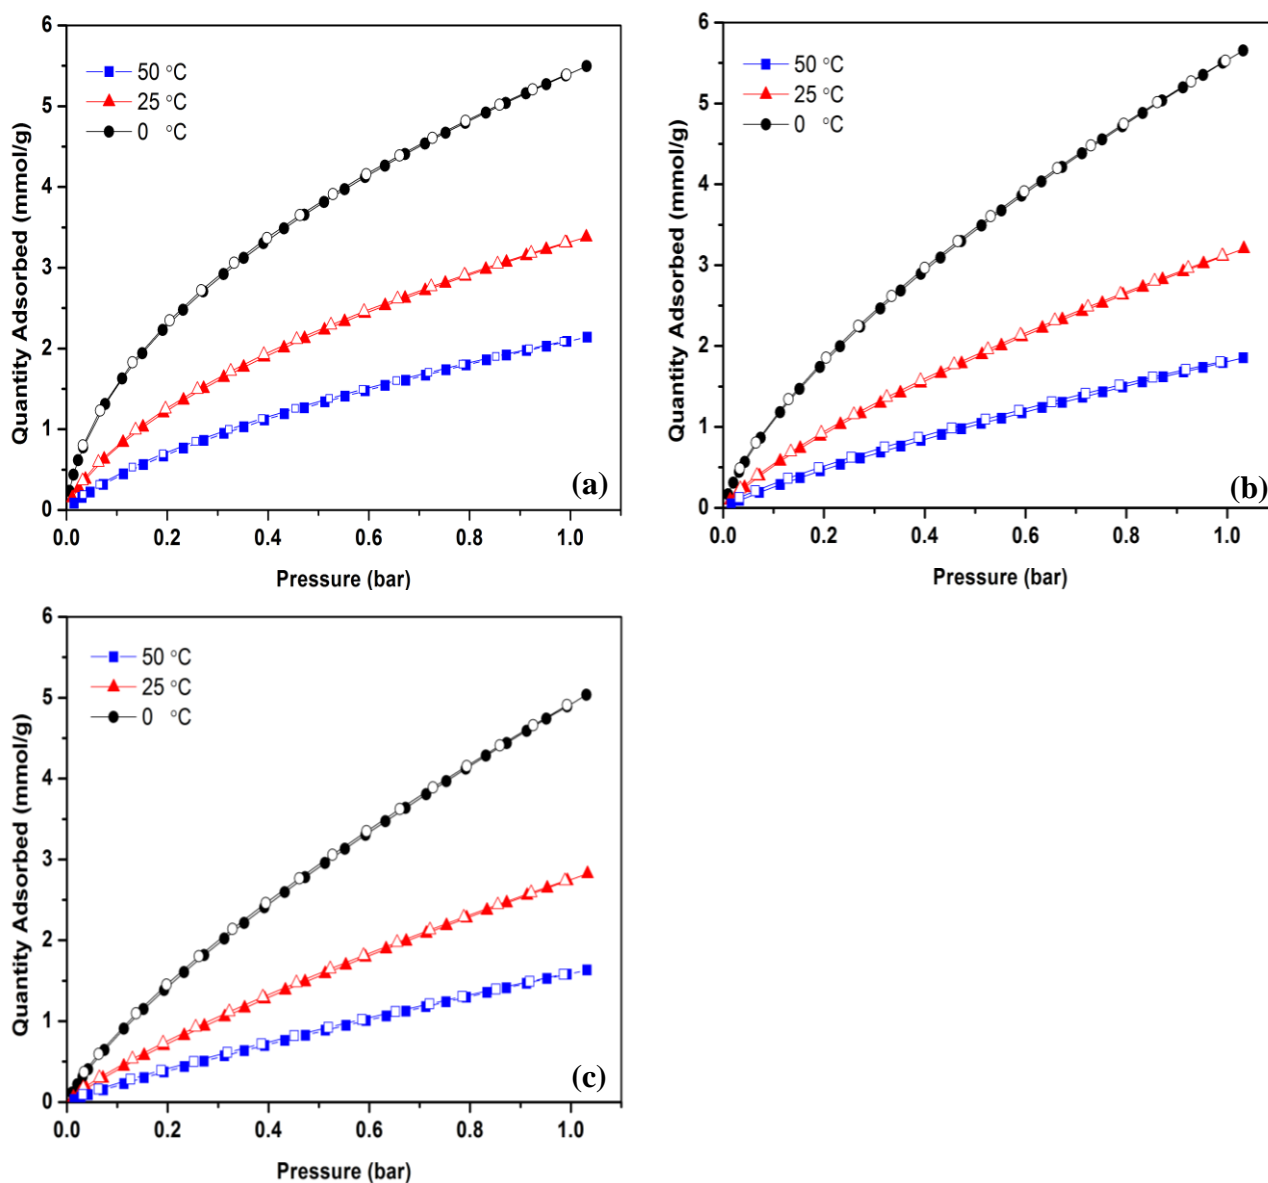

**Fig. S8** CO<sub>2</sub> adsorption isotherms at 0, 25, and 50 °C (Closed markers: gas adsorption and open markers: gas desorption) for (a) NS1, (b) NS2, and (c) NS3.

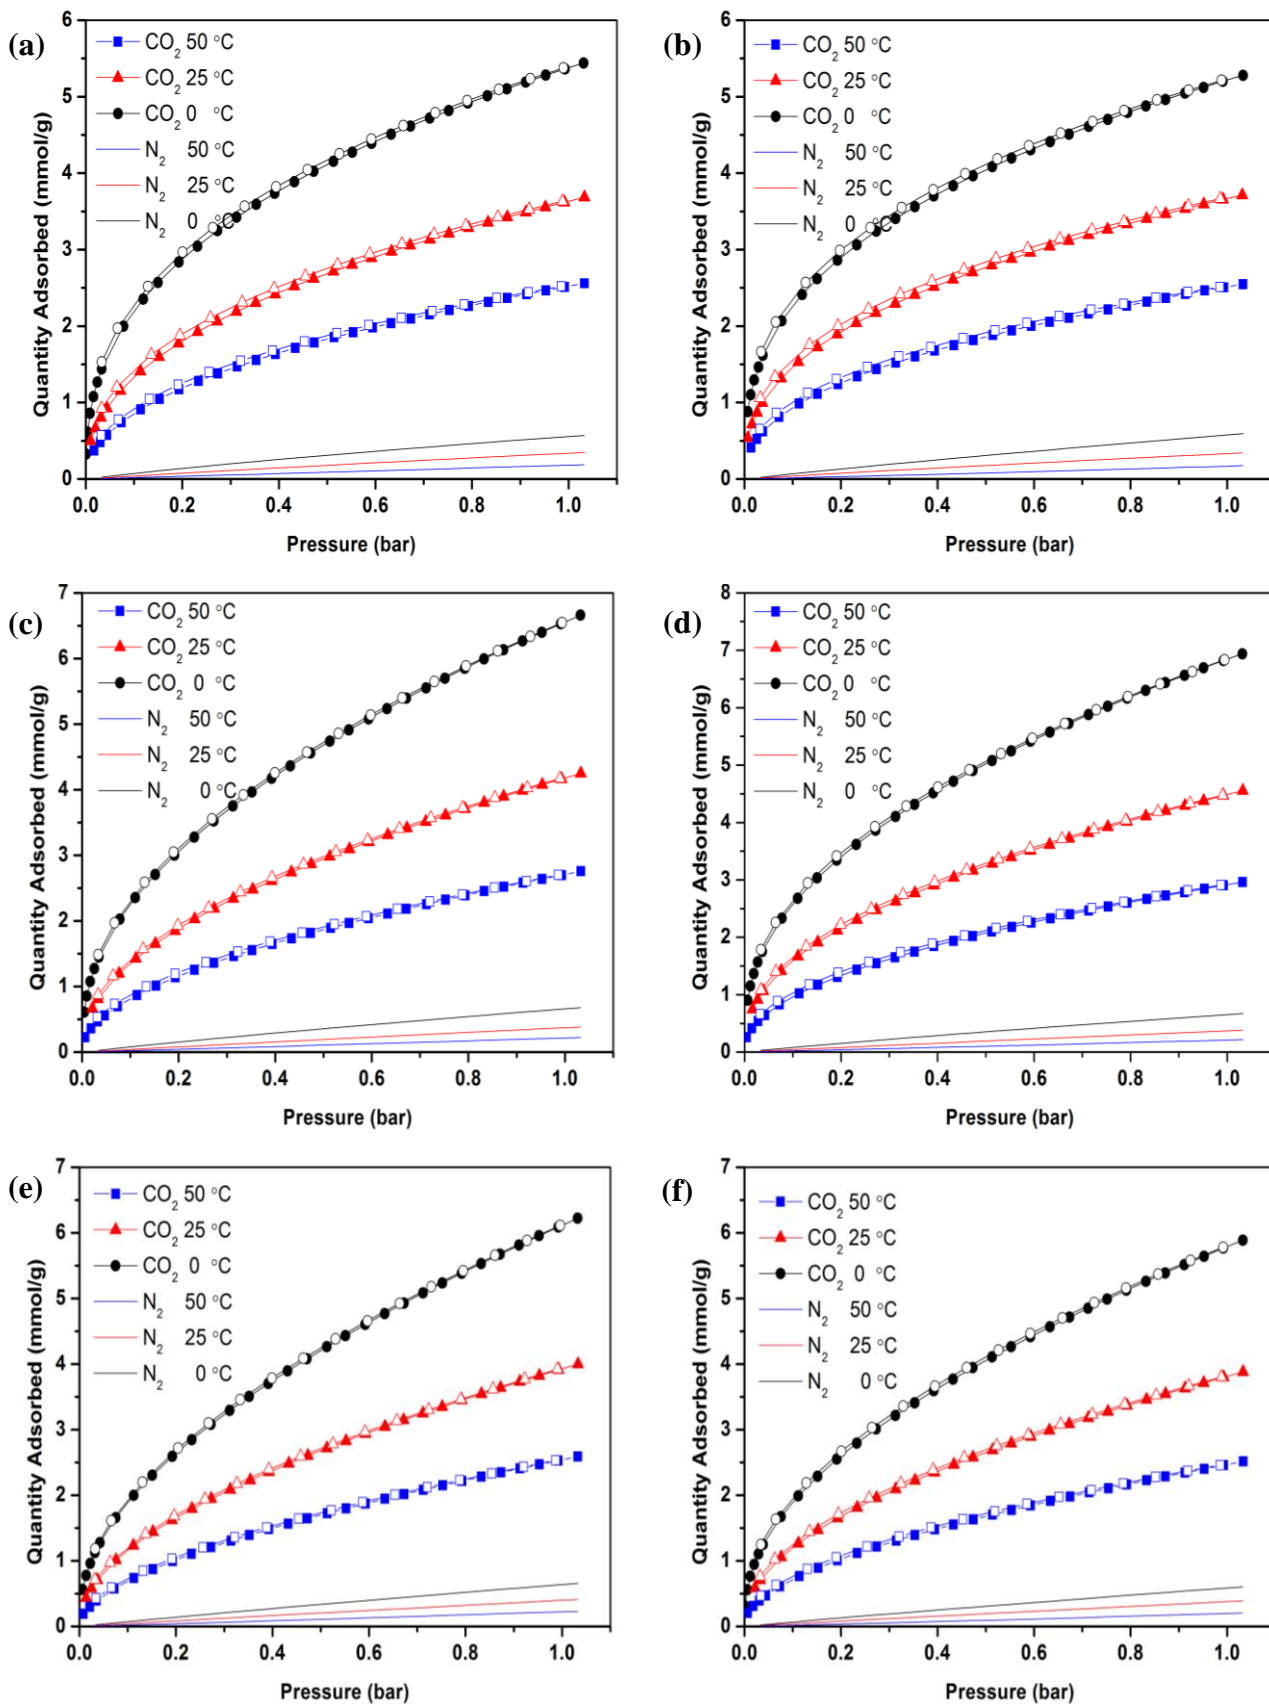

**Fig. S9** CO<sub>2</sub> and N<sub>2</sub> adsorption isotherms (Closed markers: gas adsorption and open markers: gas desorption for (a) SNS1-10, (b) SNS1-20, (c) SNS2-10, (d) SNS2-20, (e) SNS3-10, and (f) SNS3-20.

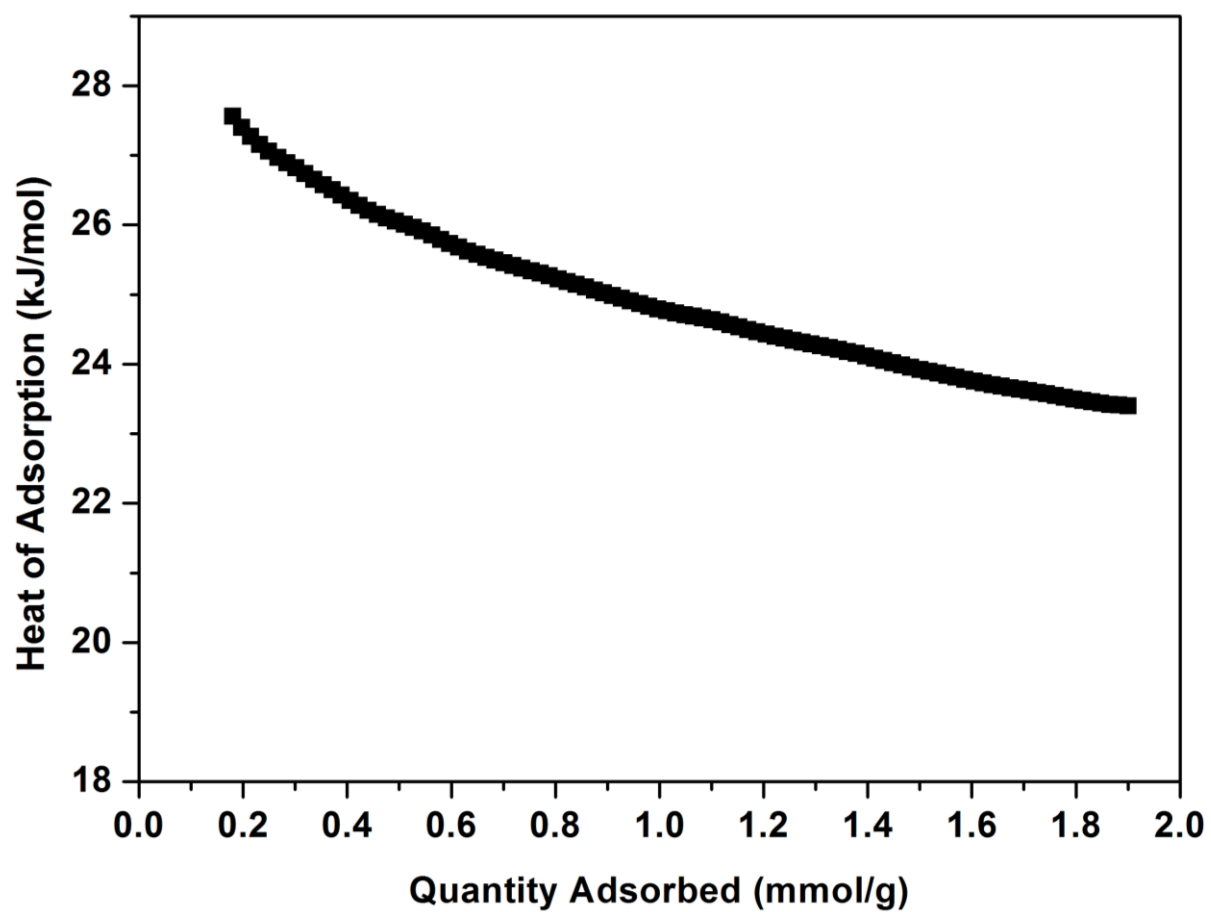

**Fig. S10** Isosteric heats of CO<sub>2</sub> adsorption for NS2 estimated from the CO<sub>2</sub> adsorption isotherms at 0, 25, and 50 °C.

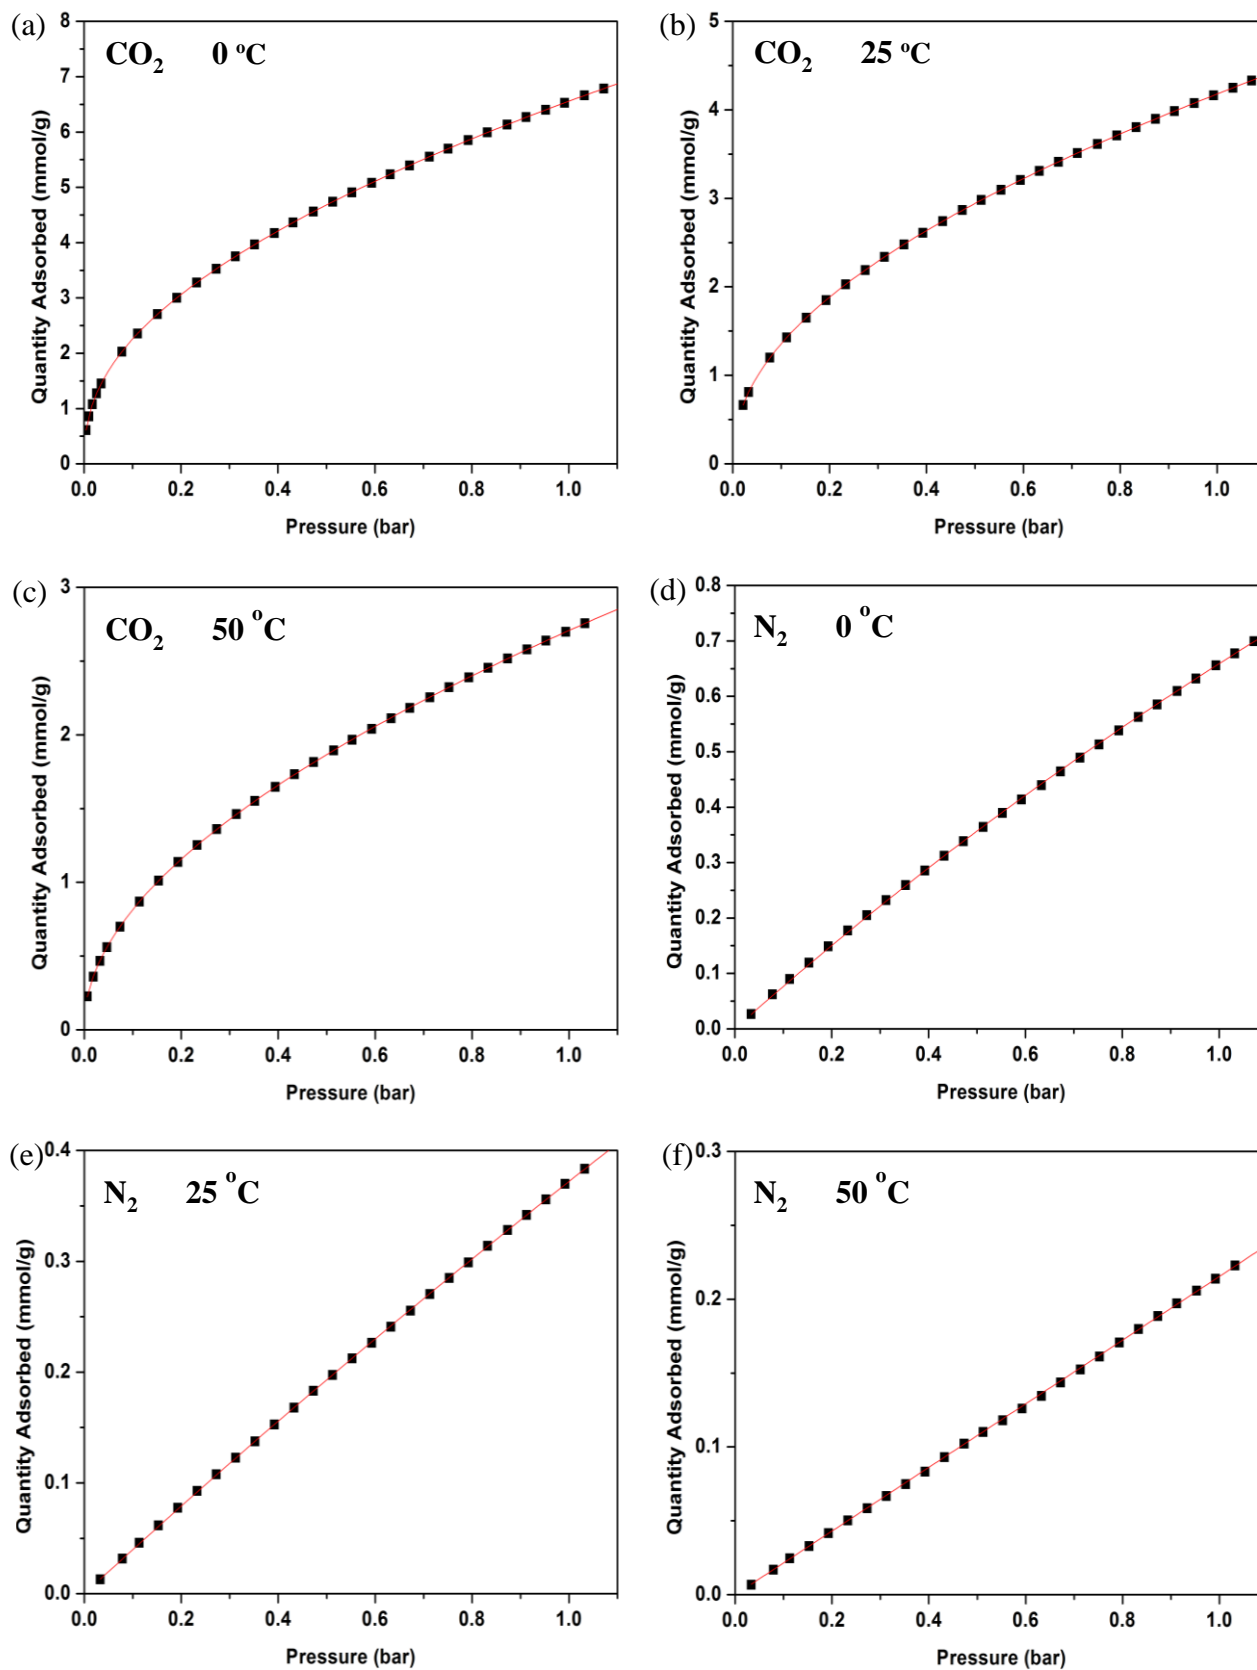

**Fig. S11** Dual-site Langmuir-Freundlich equation fits for CO<sub>2</sub> adsorption isotherms of SNS2-10 at (a) 0, (b) 25, and (c) 50 °C. Langmuir equation fits for N<sub>2</sub> adsorption isotherms of SNS2-10 at (d) 0, (e) 25, and (f) 50 °C.

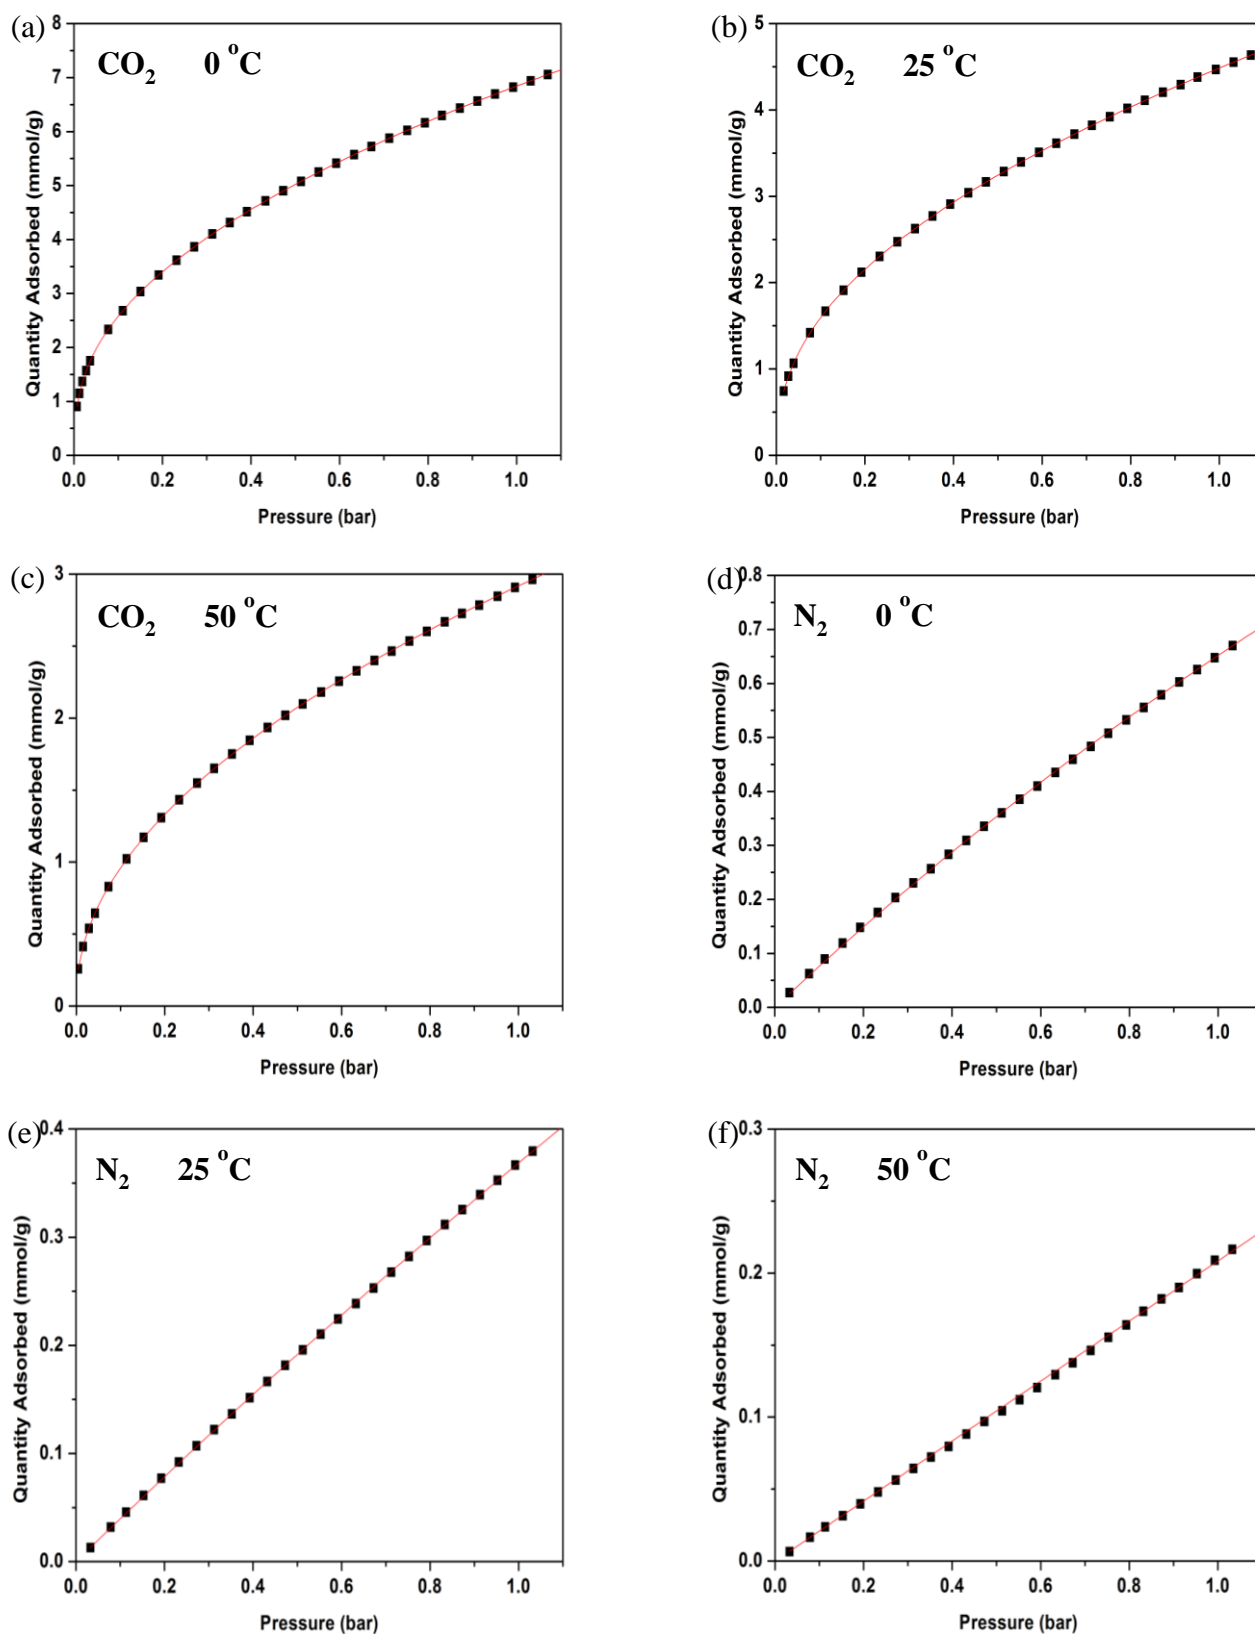

**Fig. S12** Dual-site Langmuir-Freundlich equation fits for CO<sub>2</sub> adsorption isotherms of SNS2-20 at (a) 0, (b) 25, and (c) 50 °C. Langmuir equation fits for N<sub>2</sub> adsorption isotherms of SNS2-20 at (d) 0, (e) 25, and (f) 50 °C.

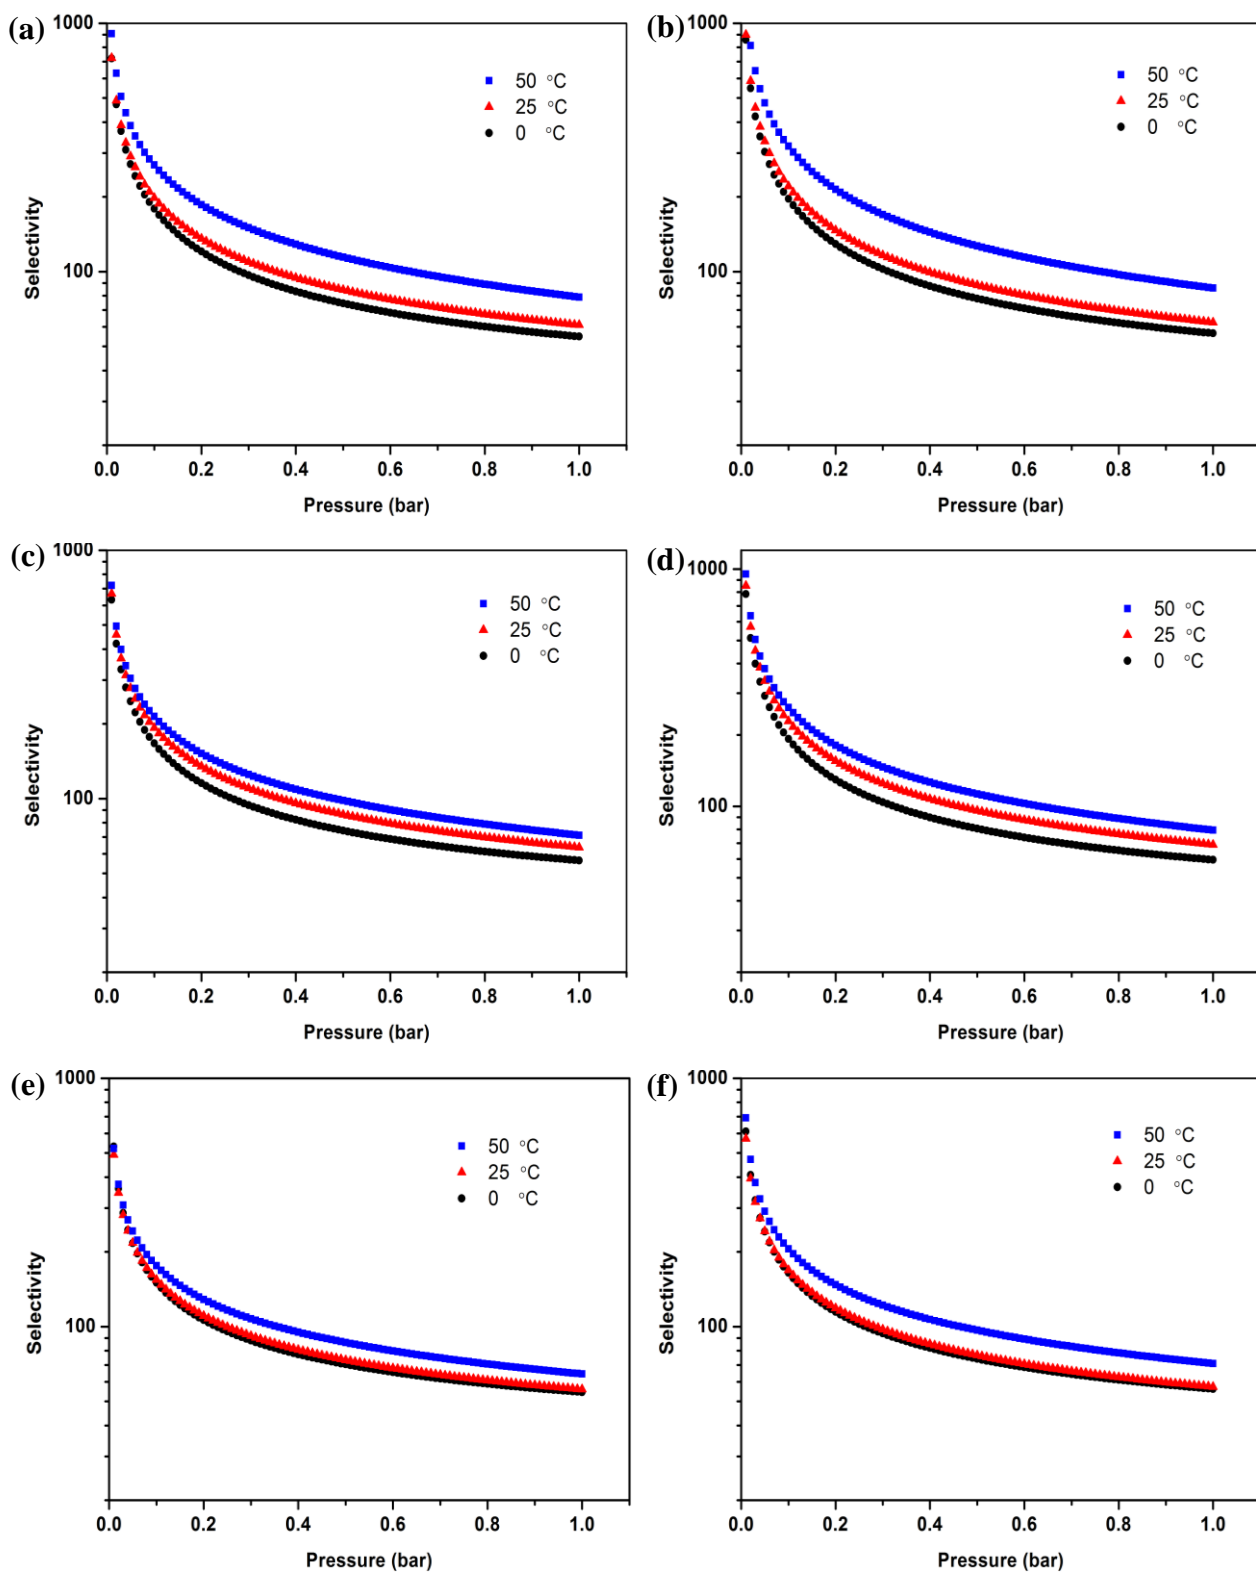

**Fig. S13** IAST selectivities (CO<sub>2</sub> : N<sub>2</sub> = 0.15 : 0.85) at 0, 25, and 50 °C for (a) SNS1-10, (b) SNS1-20, (c) SNS2-10, (d) SNS2-20, (e) SNS3-10, and (f) SNS3-20.

## C. Supplementary Tables

**Table S1** Chemical composition of NS1, NS2, NS3, and NaOH impregnated SNS2-10 and SNS2-20 by EDX analysis.

| Elements | NS1     |         | NS2     |         | NS3     |         | SNS2-10 |         | SNS2-20 |         |
|----------|---------|---------|---------|---------|---------|---------|---------|---------|---------|---------|
|          | Weight% | Atomic% |
| N        | 6.49    | 5.66    | 4.73    | 4.11    | 2.77    | 2.40    | 3.58    | 3.34    | 3.83    | 3.51    |
| C        | 89.99   | 91.64   | 92.26   | 93.59   | 94.72   | 95.70   | 71.05   | 77.12   | 79.90   | 85.46   |
| O        | 3.52    | 2.69    | 3.01    | 2.29    | 2.51    | 1.91    | 20.80   | 16.95   | 7.92    | 6.36    |
| Na       | -       | -       | -       | -       | -       | -       | 4.57    | 2.59    | 8.35    | 4.67    |

**Table S2** Distributions of nitrogen configurations and total nitrogen amount measured by XPS.

| Sample | Pyridonic / Pyrrolic (%) | Pyridinic (%) | Quaternary (%) | Pyridine Oxide (%) | $\pi - \pi^*$ (%) | Total N (atom %) |
|--------|--------------------------|---------------|----------------|--------------------|-------------------|------------------|
| NS1    | 42.20                    | 28.33         | 10.13          | 11.49              | 7.85              | 8.45             |
| NS2    | 47.13                    | 24.95         | 7.28           | 10.36              | 10.29             | 3.08             |
| NS3    | 44.03                    | 20.16         | 9.77           | 15.55              | 10.49             | 1.87             |



**Table S3** Comparison of heat of ad(b)sorption for different sorbents

| Sorbents                           | Heat of ad(b)sorption (kJ mol <sup>-1</sup> ) <sup>a)</sup> | Reference |
|------------------------------------|-------------------------------------------------------------|-----------|
| Ionic Liquids (ILs)                | 20                                                          | 10        |
| PPN-6-CH <sub>2</sub> -DETA (PPNs) | 56                                                          | 5         |
| UTSA-16 (MOFs)                     | 53                                                          | 11        |
| 1-en (MOFs)                        | 49                                                          | 9         |
| Zeolite 13X                        | 41                                                          | 12        |
| SA-2N-P (Carbon)                   | 41                                                          | 13        |
| SNS2-20 (Carbon)                   | 37                                                          | This work |

a) Heat of adsorption of solid sorbents was estimated at 1mmol/g CO<sub>2</sub> loading.

**Table S4** Dual-site Langmuir-Freundlich model parameters of the CO<sub>2</sub> adsorption isotherms for SNS2-10 at 0, 25, and 50 °C.

|                                                 | 0 °C     | 25 °C    | 50 °C    |
|-------------------------------------------------|----------|----------|----------|
| q <sub>1</sub> (mmol g <sup>-1</sup> )          | 25.11655 | 10.26224 | 5.03172  |
| q <sub>2</sub> (mmol g <sup>-1</sup> )          | 13.23835 | 78.10675 | 90.26588 |
| b <sub>1</sub> (bar <sup>-n<sub>1</sub></sup> ) | 0.22506  | 0.331    | 0.17949  |
| b <sub>2</sub> (bar <sup>-n<sub>2</sub></sup> ) | 0.1719   | 0.02127  | 0.02199  |
| n <sub>1</sub>                                  | 0.40465  | 0.43595  | 0.34614  |
| n <sub>2</sub>                                  | 1.02378  | 0.8269   | 0.65334  |

**Table S5** Single-site Langmuir model parameters of the N<sub>2</sub> adsorption isotherms for SNS2-10 at 0, 25, and 50 °C.

|                           | 0 °C    | 25 °C   | 50 °C                  |
|---------------------------|---------|---------|------------------------|
| q (mmol g <sup>-1</sup> ) | 4.27706 | 5.06918 | 1681.32267             |
| b (bar)                   | 0.18214 | 0.0792  | 1.28x 10 <sup>-4</sup> |

**Table S6** Dual-site Langmuir-Freundlich model parameters of the CO<sub>2</sub> adsorption isotherms for SNS2-20 at 0, 25, and 50 °C.

|                                                 | 0 °C     | 25 °C    | 50 °C     |
|-------------------------------------------------|----------|----------|-----------|
| q <sub>1</sub> (mmol g <sup>-1</sup> )          | 6.94021  | 20.94423 | 5.32468   |
| q <sub>2</sub> (mmol g <sup>-1</sup> )          | 17.45695 | 9.68185  | 189.91881 |
| b <sub>1</sub> (bar <sup>-n<sub>1</sub></sup> ) | 1.15028  | 0.0703   | 0.03728   |
| b <sub>2</sub> (bar <sup>-n<sub>2</sub></sup> ) | 0.21847  | 0.47307  | 0.01457   |
| n <sub>1</sub>                                  | 0.414    | 0.94866  | 0.12697   |
| n <sub>2</sub>                                  | 0.92021  | 0.43549  | 0.5284    |

**Table S7** Single-site Langmuir model parameters of the N<sub>2</sub> adsorption isotherms for SNS2-20 at 0, 25, and 50 °C.

|                           | 0 °C    | 25 °C   | 50 °C                  |
|---------------------------|---------|---------|------------------------|
| q (mmol g <sup>-1</sup> ) | 4.18027 | 4.85964 | 3046.3245              |
| b (bar)                   | 0.18469 | 0.08206 | 6.84x 10 <sup>-5</sup> |

## D. Supplementary References

1. N. D. Hutson, S. A. Speakman and E. A. Payzant, *Chemistry of Materials*, 2004, 16, 4135-4143.
2. J.-W. Kim and H.-G. Lee, *Metall and Materi Trans B*, 2001, 32, 17-24.
3. Y. Min, S.-M. Hong, S. Kim, K. Lee and S. Jeon, *Korean J. Chem. Eng.*, 2014, 31, 1668-1673.
4. J. A. Mason, K. Sumida, Z. R. Herm, R. Krishna and J. R. Long, *Energy & Environmental Science*, 2011, 4, 3030-3040.
5. W. Lu, J. P. Sculley, D. Yuan, R. Krishna, Z. Wei and H.-C. Zhou, *Angewandte Chemie International Edition*, 2012, 51, 7480-7484.
6. A. L. Myers and J. M. Prausnitz, *AIChE Journal*, 1965, 11, 121-127.
7. J. Byun, S.-H. Je, H. A. Patel, A. Coskun and C. T. Yavuz, *Journal of Materials Chemistry A*, 2014, 2, 12507-12512.
8. H. A. Patel, S. Hyun Je, J. Park, D. P. Chen, Y. Jung, C. T. Yavuz and A. Coskun, *Nat Commun*, 2013, 4, 1357.
9. W. R. Lee, S. Y. Hwang, D. W. Ryu, K. S. Lim, S. S. Han, D. Moon, J. Choi and C. S. Hong, *Energy & Environmental Science*, 2014, 7, 744-751.
10. C. Wang, X. Luo, H. Luo, D.-e. Jiang, H. Li and S. Dai, *Angewandte Chemie International Edition*, 2011, 50, 4918-4922.
11. S. Xiang, Y. He, Z. Zhang, H. Wu, W. Zhou, R. Krishna and B. Chen, *Nat Commun*, 2012, 3, 954.
12. J.-S. Lee, J.-H. Kim, J.-T. Kim, J.-K. Suh, J.-M. Lee and C.-H. Lee, *Journal of Chemical & Engineering Data*, 2002, 47, 1237-1242.
13. X. Ma, Y. Li, M. Cao and C. Hu, *Journal of Materials Chemistry A*, 2014, 2, 4819-4826.
